# Supplementary material
Source: PubMed Central journal article supplement (PMC3124021)

Figure 2, electronic appendix

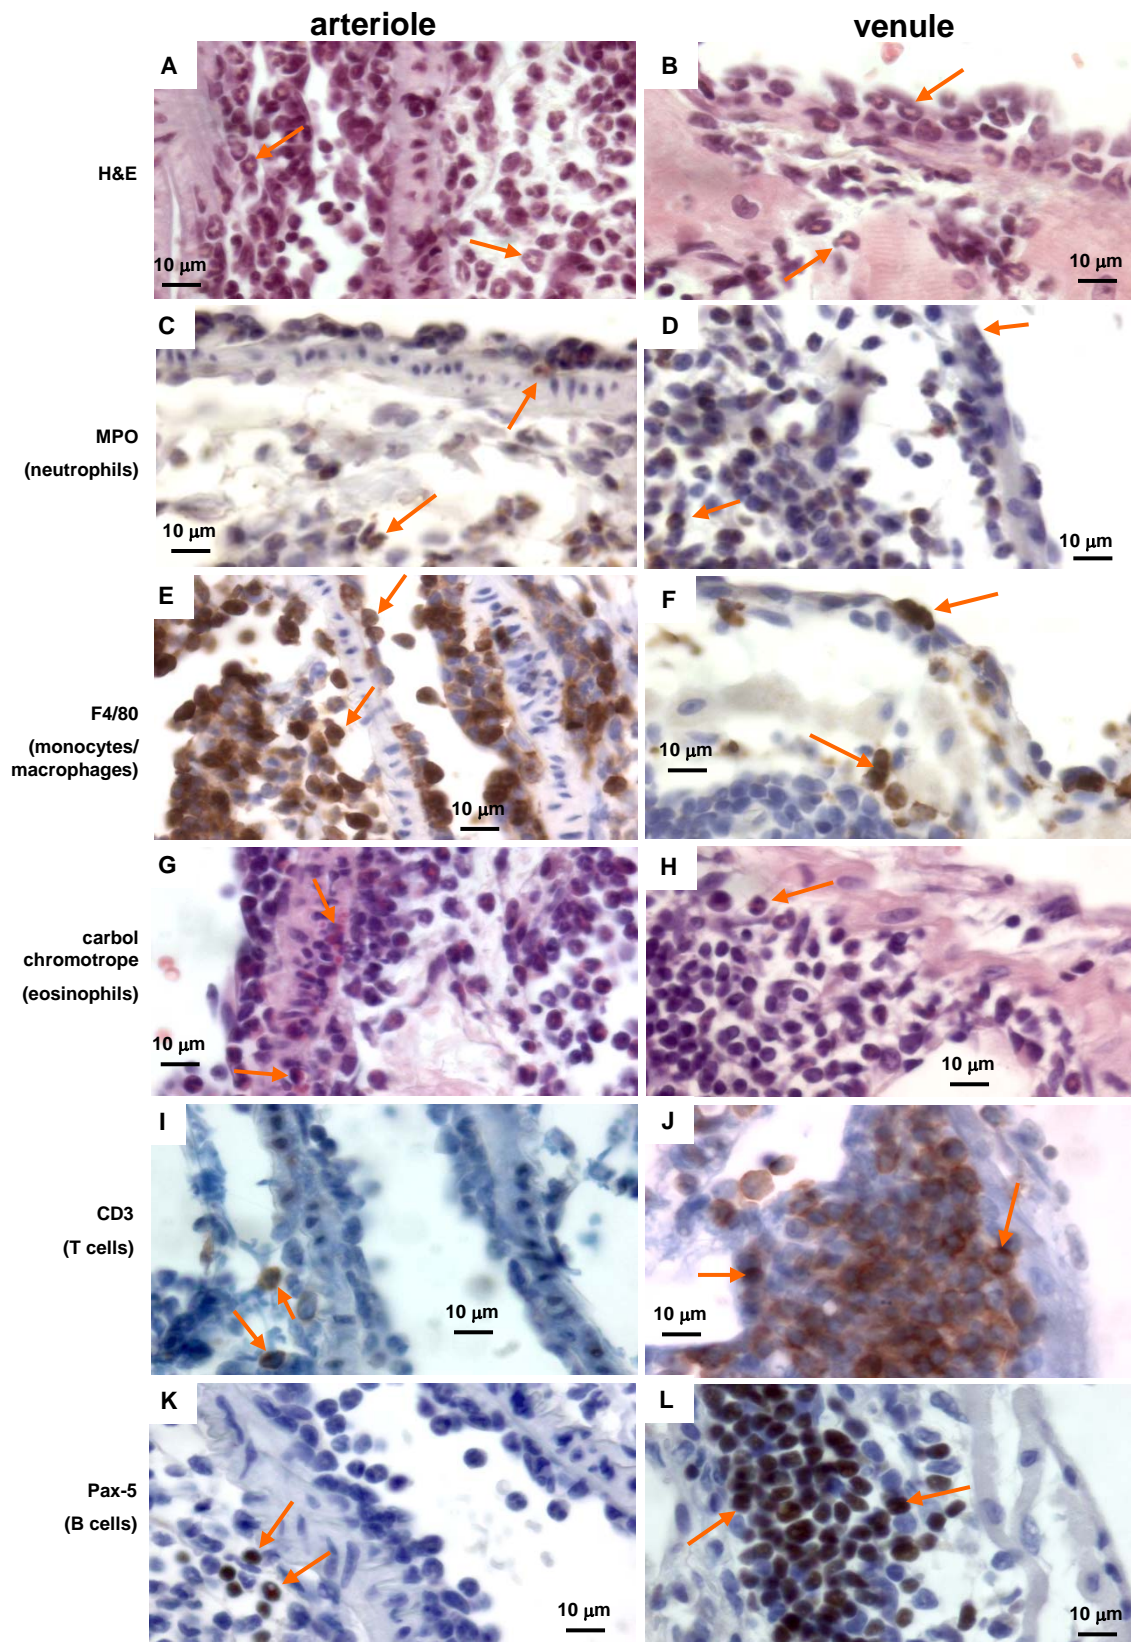

Supplement: mmc2.pdf [file mmc2.pdf]
